# Supplementary material for: Longitudinal Assessment of Intraretinal Microvascular Abnormalities in Diabetic Retinopathy Using Swept-Source Optical Coherence Tomography Angiography
Source: PubMed Central journal article supplement — Invest Ophthalmol Vis Sci. 2024 Jul 18;65(8):29. doi: 10.1167/iovs.65.8.29 (PMC11262475; doi:10.1167/iovs.65.8.29), 2024-07-18
Supplement: iovs-65-8-29_s001.pdf [file iovs-65-8-29_s001.pdf]

**Supplementary Table 1. The Cohen’s Kappa values for the WF SS-OCTA characteristics**

|                                | Kappa |
|--------------------------------|-------|
| The presence of IRMA           | 0.77  |
| The presence of NPA            | 0.73  |
| The presence of NVE            | 0.69  |
| The presence of NVD            | 0.73  |
| Stable IRMA                    | 0.70  |
| Progression of IRMA            | 0.76  |
| Regression IRMA                | 0.68  |
| Obliteration IRMA              | 0.58  |
| New NVE developed from venules | 0.65  |
| New NVE developed from IRMA    | 0.61  |
| New NVD                        | 0.61  |

IRMA= intraretinal microvascular abnormalities; NPA= nonperfusion areas; NV=neovascularizations; NVE=neovascularization elsewhere; NVD=neovascularizations of the optic disc; F/U= follow-ups

**Supplementary Table 2. OCTA metrics at Baseline and F/U**

|     |                | NPDR                |                     |         | PDR                 |                     |         |
|-----|----------------|---------------------|---------------------|---------|---------------------|---------------------|---------|
|     |                | BL                  | F/U                 | P value | BL                  | F/U                 | P value |
|     |                | Median (IQR)        | Median (IQR)        |         | Median (IQR)        | Median (IQR)        |         |
|     | Ischemia Index | 0.03 (0-0.07)       | 0.04 (0-0.09)       | <0.001  | 0.14 (0.11-0.14)    | 0.17 (0.11-0.22)    | <0.001  |
| VD  | SCP            | 0.35 (0.3-0.38)     | 0.35 (0.30-0.38)    | 0.323   | 0.33 (0.29-0.36)    | 0.32 (0.29-0.35)    | 0.351   |
|     | DCP            | 0.16 (0.10-0.23)    | 0.14 (0.09-0.19)    | 0.002   | 0.15 (0.10-0.19)    | 0.12 (0.08-0.16)    | 0.001   |
|     | Retina         | 0.38 (0.33-0.40)    | 0.37 (0.33-0.41)    | 0.317   | 0.36 (0.32-0.39)    | 0.35 (0.32-0.38)    | 0.150   |
| VSD | SCP            | 12.30 (10.60-13.25) | 11.90 (10.29-13.09) | 0.397   | 11.34 (10.06-12.59) | 11.02 (10.05-12.07) | 0.250   |
|     | DCP            | 5.93 (3.86-8.37)    | 4.91 (3.11-6.81)    | 0.002   | 5.32 (3.67-6.81)    | 4.21 (3.05-5.84)    | 0.001   |
|     | Retina         | 13.31 (11.85-14.31) | 12.88 (11.44-14.20) | 0.490   | 12.36 (11.30-13.37) | 12.10 (11.19-13.17) | 0.131   |
| FAZ | Raw Length     | 2.82 (2.16-3.37)    | 2.46 (1.95-3.11)    | 0.204   | 2.55 (2.04-3.25)    | 2.44 (1.97-3.28)    | 0.251   |
|     | Circularity    | 0.64 (0.51-0.73)    | 0.67 (0.56-0.73)    | 0.031   | 0.62 (0.55-0.69)    | 0.64 (0.54-0.72)    | 0.665   |
|     | Raw Size       | 0.40 (0.25-0.51)    | 0.33 (0.22-0.47)    | 0.236   | 0.32 (0.22-0.47)    | 0.31 (0.20-0.50)    | 0.312   |

NPDR=non-proliferative diabetic retinopathy, PDR=proliferative diabetic retinopathy; VD=vessel density; VSD=vessel skeletonized density; FAZ=foveal avascular zone; SCP=superficial capillary plexus; DCP=deep capillary plexus; BL=baseline; F/U= follow-ups; Ischemia index=non-perfusion areas/total area.

**Supplementary Table 3**

**Baseline features for regression of IRMA**

|                   | HR   | P            | 95% CI     |
|-------------------|------|--------------|------------|
| Age               | 0.95 | 0.095        | 0.9-1.01   |
| Diabetes duration | 0.97 | 0.164        | 0.92-1.01  |
| HbA1c             | 1.19 | 0.168        | 0.93-1.53  |
| BMI               | 0.93 | 0.215        | 0.83-1.04  |
| Hypertension      | 0.30 | <b>0.004</b> | 0.13-0.68  |
| Prior PRP         | 3.18 | 0.232        | 0.48-21.24 |
| Presence of NVE   | 2.25 | 0.115        | 0.82-6.14  |

**Time-varying features for regression of IRMA**

|                      | HR   | P            | 95% CI     |
|----------------------|------|--------------|------------|
| Age                  | 0.95 | 0.044        | 0.91-1     |
| Diabetes duration    | 0.94 | 0.068        | 0.87-1     |
| HbA1c                | 1.07 | 0.752        | 0.71-1.61  |
| Injection during F/U | 3.33 | <b>0.039</b> | 1.07-10.21 |
| PRP during F/U       | 3.98 | 0.055        | 0.98-16.33 |
| DME                  | 0.59 | 0.410        | 0.18-1.34  |
| $\Delta$ BMI         | 1.69 | 0.259        | 0.68-4.23  |
| $\Delta$ MABP        | 1.06 | 0.880        | 0.48-2.33  |
| $\Delta$ FAZ         | 0.01 | <b>0.007</b> | 0-0.26     |

**Baseline features for obliteration of IRMA**

|                   | HR   | P     | 95% CI    |
|-------------------|------|-------|-----------|
| Age               | 0.99 | 0.513 | 0.95-1.03 |
| Diabetes duration | 1.04 | 0.132 | 0.99-1.1  |
| HbA1c             | 1.05 | 0.708 | 0.8-1.39  |

|                   |       |                  |                  |
|-------------------|-------|------------------|------------------|
| Diagnose          | 1.37  | 0.360            | 0.7-2.69         |
| Prior focal laser | 0.10  | 0.050            | 0.01-1           |
| Prior PRP         | 13.57 | <b>&lt;0.001</b> | 15.33-1622.31    |
| DME               | 4.41  | 0.065            | 0.97-21.22       |
| NV                | 1.03  | 0.643            | 0.45-3.6         |
| NVD               | 1.19  | 0.394            | 0.3-4.81         |
| ISI               | 73.13 | 0.209            | 4867924-11010.43 |
| VDDCP             | 0.74  | <b>0.007</b>     | 0.59-0.92        |
| Age               | 0.99  | 0.513            | 0.95-1.03        |

#### Time-varying features for obliteration of IRMA

|                      | HR   | P value          | 95% CI     |
|----------------------|------|------------------|------------|
| Age                  | 1.01 | 0.754            | 0.97-1.05  |
| Diabetes duration    | 1.06 | 0.037            | 1-1.11     |
| HbA1c                | 1.11 | 0.434            | 0.85-1.46  |
| Injection during F/U | 3.96 | <b>0.025</b>     | 1.19-13.18 |
| ΔBMI                 | 4.19 | <b>&lt;0.001</b> | 2.49-7.04  |

#### Baseline features for progression of IRMA

|                   | HR    | P            | 95% CI      |
|-------------------|-------|--------------|-------------|
| Age               | 1.01  | 0.379        | 0.98-1.05   |
| Diabetes duration | 0.98  | 0.594        | 0.96-1.02   |
| HbA1c             | 1.19  | 0.094        | 0.97-1.45   |
| Hypertension      | 0.48  | 0.086        | 0.21-1.11   |
| Prior focal laser | 0.10  | 0.050        | 0.01-1      |
| NVE               | 1.51  | 0.321        | 0.67-3.35   |
| ISI               | 23.17 | <b>0.049</b> | 1.01-529.95 |

#### Time-varying features for progression of IRMA

|                   | HR   | P                | 95% CI    |
|-------------------|------|------------------|-----------|
| Age               | 1.02 | 0.272            | 0.99-1.05 |
| Diabetes duration | 0.98 | 0.194            | 0.95-1.01 |
| HbA1c             | 1.18 | 0.100            | 0.97-1.44 |
| PRP during F/U    | 5.30 | <b>&lt;0.001</b> | 2.08-13.5 |

#### Baseline features for NVE from veins

|  | HR | P | 95% CI |
|--|----|---|--------|
|--|----|---|--------|

|                   |      |              |           |
|-------------------|------|--------------|-----------|
| Age               | 0.97 | 0.207        | 0.92-1.02 |
| Diabetes duration | 1.01 | 0.803        | 0.95-1.08 |
| HbA1c             | 1.40 | <b>0.019</b> | 1.06-1.84 |
| ISI               | 1.02 | 0.320        | 0.98-1.07 |
| BMI               | 0.97 | 0.318        | 0.92-1.03 |

**Time-varying features for NVE from veins**

|                   | HR   | P                | 95% CI     |
|-------------------|------|------------------|------------|
| Age               | 0.96 | 0.166            | 0.91-1.02  |
| Diabetes duration | 0.99 | 0.695            | 0.91-1.06  |
| HbA1c             | 1.29 | 0.084            | 0.97-1.73  |
| IRMA obliteration | 2.78 | 0.284            | 0.43-18.08 |
| IRMA progression  | 1.99 | 0.425            | 0.37-10.85 |
| ISI               | 6.02 | <b>&lt;0.001</b> | 2.73-13.29 |
| MABP              | 1.18 | 0.590            | 0.65-2.14  |

**Baseline features for NVE from IRMA**

|                   | HR   | P            | 95% CI    |
|-------------------|------|--------------|-----------|
| Age               | 0.96 | <b>0.049</b> | 0.92-1    |
| Diabetes duration | 1.04 | 0.263        | 0.97-1.11 |
| HbA1c             | 0.82 | 0.471        | 0.48-1.4  |
| ISI               | 1.02 | 0.403        | 0.97-1.07 |
| BMI               | 0.99 | 0.594        | 0.94-1.04 |

**Time-varying features for NVE from IRMA**

|                   | HR   | P     | 95% CI     |
|-------------------|------|-------|------------|
| Age               | 0.95 | 0.055 | 0.91-1     |
| Diabetes duration | 1.02 | 0.518 | 0.96-1.09  |
| HbA1c             | 0.98 | 0.947 | 0.55-1.74  |
| IRMA obliteration | 2.69 | 0.341 | 0.35-20.62 |
| IRMA progression  | 2.28 | 0.470 | 0.24-21.44 |
| $\Delta$ ISI      | 0.18 | 0.168 | 0.01-2.07  |
| $\Delta$ MABP     | 0.43 | 0.275 | 0.1-1.95   |
